# Supplementary material for: Predicting Vaccine Effectiveness for Hospitalization and Symptomatic Disease for Novel SARS-CoV-2 Variants Using Neutralizing Antibody Titers
Source: MDPI journal article supplement (doi:10.3390/v16030479), 2024-03-20
Supplement: s1 [file s1]

Supplemental Material for  
**Predicting Vaccine Effectiveness for Hospitalization  
and Symptomatic Disease for Novel SARS-CoV-2  
Variants Using Neutralizing Antibody Titers**  
Billy J. Gardner and A. Marm Kilpatrick

**Table S1.** Fold reductions or inverse of neutralizing antibody titers relative to wild-type virus (1/NATR<sub>var</sub>). Comparisons that were not made in the Reference are denoted with a “-”.

| Ref. | Alpha | Gamma | Delta | Beta | BA.1 | BA.2 | BA.4/5 | BA.1 (Dec. 2021) |
|------|-------|-------|-------|------|------|------|--------|------------------|
| [1]  | 1.1   | 1.2   | -     | 4.2  | -    | -    | -      | -                |
| [2]  | -     | -     | -     | -    | 19.3 | 14   | 23.3   | -                |
| [3]  | -     | -     | -     | 7    | 32.3 | -    | -      | -                |
| [4]  | 1.5   | 4     | -     | 2.5  | -    | -    | -      | -                |
| [5]  | -     | -     | -     | -    | -    | -    | -      | 41.4             |
| [6]  | -     | -     | 7.7   | -    | -    | -    | -      | -                |
| [7]  | -     | -     | -     | 11.4 | 66.3 | -    | -      | -                |
| [8]  | 2.5   | 1.1   | -     | 4.6  | -    | -    | -      | -                |
| [9]  | 2.1   | 6.3   | -     | 39.4 | -    | -    | -      | -                |
| [10] | 1.6   | -     | 3.2   | 13.7 | 68.3 | -    | -      | -                |
| [11] | -     | -     | -     | -    | 6.2  | 6.2  | 6.2    | -                |
| [12] | -     | -     | -     | -    | 9.6  | 8.9  | -      | -                |
| [13] | 2.1   | 2.3   | -     | 12.2 | -    | -    | -      | -                |
| [14] | -8    | 1.2   | -     | 2.7  | -    | -    | -      | -                |
| [15] | -     | -     | 2     | 6.2  | 12.9 | -    | -      | -                |
| [16] | 1.5   | 2     | 2.2   | 8.8  | -    | -    | -      | -                |
| [17] | -     | -     | -     | -    | 7.2  | 5.6  | 9.3    | -                |
| [18] | 1.5   | 2.2   | -     | 3.4  | -    | -    | -      | -                |
| [19] | -     | -     | -     | -    | 4.9  | -    | 13.6   | -                |
| [20] | 1.4   | 1.8   | -     | 9.1  | -    | -    | -      | -                |
| [21] | 3.5   | 4.8   | -     | 12.1 | -    | -    | -      | -                |
| [22] | 1.9   | 2.3   | 4.4   | 5.3  | -    | -    | -      | -                |
| [23] | -     | -     | -     | -    | -    | -    | -      | 37               |

|      |     |     |     |     |    |    |   |   |
|------|-----|-----|-----|-----|----|----|---|---|
| [24] | 2   | 3.2 | 2.2 | 7.5 | -  | -  | - | - |
| [25] | -   | -   | -   | -   | 27 | 23 | - | - |
| [26] | 2.2 | 1.9 | -   | 4.6 | -  | -  | - | - |

**Table S2.** The fitted model for the fold-reduction  $\ln(1/\text{NATR}_{\text{var}})$  in neutralizing antibody titers for virus variants relative to WT with variant as a fixed effect and study as a random effect. Alpha was the reference level; the standard deviation of the random effect, study, was 0.51.

| Predictor         | Estimate | SE   | t-value | P-value |
|-------------------|----------|------|---------|---------|
| Alpha (Intercept) | 0.45     | 0.16 | 2.75    | 0.0087  |
| Gamma             | 0.32     | 0.16 | 2.05    | 0.048   |
| Delta             | 0.37     | 0.23 | 1.63    | 0.11    |
| Beta              | 1.37     | 0.15 | 9.26    | <0.001  |
| BA.1              | 2.47     | 0.22 | 11.06   | <0.001  |
| BA.2              | 2.17     | 0.29 | 7.49    | <0.001  |
| BA.4/5            | 2.54     | 0.31 | 8.25    | <0.001  |
| BA.1 Dec. 2021    | 3.22     | 0.49 | 6.63    | <0.001  |

**Table S3.** Estimates of fold-reduction ( $1/\text{NATR}_{\text{var}}$ ) in neutralizing antibody titers for virus variants relative to WT with 95% CIs.

| Variant          | Fold Reduction (95% CI) |
|------------------|-------------------------|
| Alpha            | 1.57 (1.14-2.16)        |
| Gamma            | 2.15 (1.55-2.99)        |
| Delta            | 2.27 (1.45-3.55)        |
| Beta             | 6.17 (4.58-8.30)        |
| BA.1             | 18.5 (12.8-26.7)        |
| BA.2             | 13.6 (8.3-22.4)         |
| BA.4/5           | 19.9 (11.6-34.1)        |
| BA.1 (Dec. 2021) | 39.1 (16.0-96.0)        |

**Table S4.** Vaccine effectiveness against symptomatic disease estimates used to fit the VE-NATR<sub>tot</sub> model and shown in Figure 2A.

| Variant | Ref. | Vaccine         | VE    | 95% CI     | Effective cases vaccine group | Effective cases control group |
|---------|------|-----------------|-------|------------|-------------------------------|-------------------------------|
| Alpha   | [31] | BNT162b2        | 0.97  | 0.97-0.97  | 30                            | 1000 <sup>a</sup>             |
| Alpha   | [32] | BNT162b2        | 0.82  | 0.73-0.88  | 27.9                          | 155.2                         |
| Alpha   | [33] | BNT162b2        | 0.89  | 0.87-0.9   | 110                           | 1000 <sup>b</sup>             |
| Alpha   | [33] | mRNA-1273       | 0.92  | 0.88-0.95  | 24.7                          | 308.2                         |
| Alpha   | [33] | ChAdOx1 nCoV-19 | 0.91  | 0.62-0.98  | 2                             | 22.4                          |
| Alpha   | [38] | BNT162b2        | 0.937 | 0.92-0.95  | 49.7                          | 788.2                         |
| Alpha   | [29] | BNT162b2        | 0.95  | 0.94-0.96  | 50                            | 1000 <sup>c</sup>             |
| Alpha   | [38] | ChAdOx1 nCoV-19 | 0.745 | 0.68-0.79  | 104.5                         | 409.7                         |
| Alpha   | [39] | NVX-CoV2373     | 0.83  | 0.71-0.94  | 14.1                          | 82.7                          |
| Alpha   | [40] | ChAdOx1 nCoV-19 | 0.7   | 0.44-0.85  | 12.6                          | 42.1                          |
| Beta    | [33] | BNT162b2        | 0.87  | 0.08-0.98  | 1.1                           | 8.7                           |
| Beta    | [33] | BNT162b2        | 1     | 0.54-1     | 0                             | 17.8                          |
| Beta    | [41] | Ad26.COV2.S     | 0.64  | 0.41-0.79  | 21                            | 58.2                          |
| Beta    | [42] | NVX-CoV2373     | 0.51  | 0-0.76     | 11.2                          | 22.9                          |
| Beta    | [43] | ChAdOx1 nCoV-19 | 0.1   | -0.77-0.55 | 15.7                          | 17.5                          |
| D614G   | [41] | Ad26.COV2.S     | 0.66  | 0.55-0.75  | 62.2                          | 182.9                         |
| D614G   | [44] | ChAdOx1 nCoV-19 | 0.67  | 0.57-0.74  | 81.9                          | 248.1                         |
| D614G   | [45] | CoronaVac       | 0.84  | 0.65-0.92  | 7.5                           | 47                            |
| D614G   | [46] | CoronaVac       | 0.65  | 0.20-0.85  | 7.4                           | 21.2                          |
| D614G   | [47] | mRNA-1273       | 0.94  | 0.89-0.97  | 10.7                          | 177.9                         |
| D614G   | [48] | NVX-CoV2373     | 0.9   | 0.83-0.95  | 14.5                          | 145.4                         |
| D614G   | [49] | BNT162b2        | 0.95  | 0.90-0.98  | 8.2                           | 164.2                         |
| D614G   | [50] | Sputnik V       | 0.92  | 0.86-0.95  | 13.9                          | 173.5                         |
| Delta   | [33] | BNT162b2        | 0.92  | 0.90-0.94  | 69.6                          | 869.9                         |
| Delta   | [33] | mRNA-1273       | 0.95  | 0.91-0.97  | 11.6                          | 233                           |
| Delta   | [33] | ChAdOx1 nCoV-19 | 0.87  | 0.69-0.95  | 5.8                           | 44.5                          |
| Delta   | [38] | BNT162b2        | 0.88  | 0.85-0.90  | 108.3                         | 902.5                         |
| Delta   | [51] | BNT162b2        | 0.444 | 0.37-0.51  | 381                           | 685                           |

|       |      |                 |       |           |       |                   |
|-------|------|-----------------|-------|-----------|-------|-------------------|
| Delta | [29] | BNT162b2        | 0.835 | 0.83-0.84 | 165   | 1000 <sup>d</sup> |
| Delta | [52] | BNT162b2        | 0.78  | 0.78-0.79 | 220   | 1000 <sup>e</sup> |
| Delta | [51] | mRNA-1273       | 0.739 | 0.66-0.80 | 67.0  | 257               |
| Delta | [38] | ChAdOx1 nCoV-19 | 0.67  | 0.61-0.72 | 201.2 | 609.8             |
| Gamma | [33] | BNT162b2        | 0.88  | 0.73-0.94 | 6.4   | 53.3              |

<sup>a-e</sup>Estimated sample sizes in the control group ( $I_c$ ) and vaccine group ( $I_v$ ) to match the original study VE 95% CI; these were rescaled to limit  $I_c$  to 1000 but maintain the correct VE: <sup>a</sup> $I_c = 19,183$ ,  $I_v = 575$ ; <sup>b</sup> $I_c = 1973$ ,  $I_v = 217$ ; <sup>c</sup> $I_c = 1855$ ,  $I_v = 93$ ; <sup>d</sup> $I_c = 270,217$ ,  $I_v = 44,586$ ; <sup>e</sup> $I_c = 40,917$ ,  $I_v = 9002$

**Table S5.** Vaccine effectiveness against hospitalization estimates used to fit the VE-NATR<sub>tot</sub> model and shown in Figure 2B.

| Variant | Ref. | Vaccine         | VE    | 95% CI    | Est. cases vaccine group | Est. cases control group |
|---------|------|-----------------|-------|-----------|--------------------------|--------------------------|
| Alpha   | [27] | Ad26.COV2.S     | 0.81  | 0.79-0.84 | 190                      | 1000 <sup>a</sup>        |
| Alpha   | [28] | BNT162b2        | 0.96  | 0.83-0.99 | 1.9                      | 46.9                     |
| Alpha   | [29] | BNT162b2        | 0.979 | 0.91-1    | 2                        | 94                       |
| Alpha   | [29] | ChAdOx1 nCoV-19 | 0.939 | 0.85-0.98 | 5                        | 81.6                     |
| Alpha   | [30] | BNT162b2        | 0.95  | 0.78-0.99 | 1.8                      | 36.6                     |
| Alpha   | [30] | ChAdOx1 nCoV-19 | 0.86  | 0.53-0.96 | 3                        | 21.3                     |
| Alpha   | [31] | BNT162b2        | 0.972 | 0.97-0.98 | 28                       | 1000 <sup>b</sup>        |
| Alpha   | [32] | BNT162b2        | 0.94  | 0.6-0.99  | 1.1                      | 18.6                     |
| Alpha   | [33] | BNT162b2        | 0.96  | 0.94-0.97 | 27.3                     | 681.3                    |
| Alpha   | [33] | mRNA-1273       | 0.95  | 0.92-0.97 | 17.8                     | 356.3                    |
| Alpha   | [33] | ChAdOx1 nCoV-19 | 0.92  | 0.41-0.99 | 1                        | 12.9                     |
| Beta    | [33] | BNT162b2        | 0.92  | 0.39-0.99 | 1                        | 12.4                     |
| Delta   | [27] | Ad26.COV2.S     | 0.85  | 0.73-0.91 | 12.9                     | 85.8                     |
| Delta   | [34] | Ad26.COV2.S     | 0.6   | 0.31-0.77 | 17.8                     | 44.5                     |
| Delta   | [34] | BNT162b2        | 0.8   | 0.73-0.85 | 52.2                     | 261                      |
| Delta   | [34] | mRNA-1273       | 0.95  | 0.92-0.97 | 17.4                     | 347.5                    |
| Delta   | [28] | BNT162b2        | 0.98  | 0.97-0.98 | 20                       | 1000 <sup>c</sup>        |
| Delta   | [28] | mRNA-1273       | 0.97  | 0.96-0.98 | 30                       | 1000 <sup>d</sup>        |
| Delta   | [28] | ChAdOx1 nCoV-19 | 0.92  | 0.86-0.95 | 13.5                     | 169.2                    |

|       |      |                 |       |           |     |                   |
|-------|------|-----------------|-------|-----------|-----|-------------------|
| Delta | [29] | BNT162b2        | 0.967 | 0.96-0.97 | 33  | 1000 <sup>e</sup> |
| Delta | [29] | ChAdOx1 nCoV-19 | 0.93  | 0.92-0.94 | 70  | 1000 <sup>f</sup> |
| Delta | [35] | BNT162b2        | 0.93  | 0.84-0.96 | 6   | 85.8              |
| Delta | [36] | BNT162b2        | 0.976 | 0.93-0.99 | 3.3 | 135.6             |
| Delta | [30] | BNT162b2        | 0.96  | 0.86-0.99 | 2.6 | 65                |
| Delta | [30] | ChAdOx1 nCoV-19 | 0.92  | 0.75-0.97 | 3   | 37.7              |
| Delta | [33] | BNT162b2        | 0.98  | 0.96-0.99 | 8.2 | 410.4             |
| Delta | [33] | mRNA-1273       | 0.98  | 0.93-1    | 2.5 | 123.6             |
| Delta | [33] | ChAdOx1 nCoV-19 | 0.9   | 0.67-0.97 | 2.9 | 28.7              |
| Gamma | [28] | BNT162b2        | 0.95  | 0.83-0.99 | 2.7 | 53.6              |
| Gamma | [37] | Ad26.COV2.S     | 0.729 | 0.35-0.91 | 6.2 | 23                |
| Gamma | [33] | BNT162b2        | 0.94  | 0.59-0.99 | 1.1 | 18.3              |

<sup>a-f</sup>Estimated sample sizes in the control group ( $I_c$ ) and vaccine group ( $I_v$ ) to match the original study VE 95% CI; these were rescaled to limit  $I_c$  to 1000 but maintain the correct VE: <sup>a</sup> $I_c = 1469$ ,  $I_v = 279$ ; <sup>b</sup> $I_c = 8784$ ,  $I_v = 245$ ; <sup>c</sup> $I_c = 1794$ ,  $I_v = 36$ ; <sup>d</sup> $I_c = 1289$ ,  $I_v = 39$ ; <sup>e</sup> $I_c = 10577$ ,  $I_v = 349$ ; <sup>f</sup> $I_c = 9085$ ,  $I_v = 636$

**Table S6.** Statistics for the fitted model between neutralizing antibody titers and VE given by the equation  $VE = 1 - \frac{1}{1 + e^{-c_0 - c_1 \log_2(NATR_{tot})}}$ .

| Endpoint            | Coefficient | Estimate | SE    | Z value | p-value                 |
|---------------------|-------------|----------|-------|---------|-------------------------|
| Symptomatic Disease | $c_0$       | -1.60    | 0.028 | -56.4   | $< 2.2 \times 10^{-16}$ |
|                     | $c_1$       | 0.53     | 0.031 | -17.2   | $< 2.2 \times 10^{-16}$ |
| Hospitalization     | $c_0$       | -2.91    | 0.052 | -56.1   | $< 2.2 \times 10^{-16}$ |
|                     | $c_1$       | -0.51    | 0.038 | -13.6   | $< 2.2 \times 10^{-16}$ |

**Table S7.** Predicted VE, 95% CIs and 95% PIs for two vaccines, two variants, two endpoints, and two immune statuses using the model shown in Figure 2.

| Variant | Prediction | Vaccine   | Endpoint        | Status             | VE   | 95% PI    | 95% CI    |
|---------|------------|-----------|-----------------|--------------------|------|-----------|-----------|
| Omicron | Updated    | mRNA-1273 | Hospitalization | Three-dose boosted | 0.9  | 0.82-0.95 | 0.89-0.91 |
| Omicron | Updated    | BNT162b2  | Hospitalization | Three-dose boosted | 0.91 | 0.84-0.96 | 0.9-0.92  |
| Omicron | Updated    | mRNA-1273 | Hospitalization | Two-dose waned     | 0.56 | 0.37-0.71 | 0.48-0.64 |

|         |              |           |                     |                    |      |            |           |
|---------|--------------|-----------|---------------------|--------------------|------|------------|-----------|
| Omicron | Updated      | BNT162b2  | Hospitalization     | Two-dose waned     | 0.46 | 0.25-0.63  | 0.37-0.56 |
| Omicron | Updated      | mRNA-1273 | Symptomatic disease | Three-dose boosted | 0.69 | 0.56-0.8   | 0.67-0.72 |
| Omicron | Updated      | BNT162b2  | Symptomatic disease | Three-dose boosted | 0.72 | 0.6-0.82   | 0.7-0.74  |
| Omicron | Updated      | mRNA-1273 | Symptomatic disease | Two-dose waned     | 0.24 | -0.01-0.43 | 0.18-0.3  |
| Omicron | Updated      | BNT162b2  | Symptomatic disease | Two-dose waned     | 0.18 | -0.09-0.38 | 0.13-0.24 |
| Omicron | Updated      | mRNA-1273 | All infections      | Three-dose boosted | 0.69 | 0.56-0.8   | 0.66-0.72 |
| Omicron | Updated      | BNT162b2  | All infections      | Three-dose boosted | 0.71 | 0.57-0.81  | 0.68-0.73 |
| Omicron | Updated      | mRNA-1273 | All infections      | Two-dose waned     | 0.44 | 0.21-0.62  | 0.33-0.55 |
| Omicron | Updated      | BNT162b2  | All infections      | Two-dose waned     | 0.38 | 0.14-0.59  | 0.27-0.52 |
| Omicron | Dec. 11 2021 | mRNA-1273 | Hospitalization     | Three-dose boosted | 0.83 | 0.73-0.91  | 0.81-0.85 |
| Omicron | Dec. 11 2021 | BNT162b2  | Hospitalization     | Three-dose boosted | 0.85 | 0.76-0.92  | 0.83-0.87 |
| Omicron | Dec. 11 2021 | mRNA-1273 | Hospitalization     | Two-dose waned     | 0.42 | 0.19-0.6   | 0.33-0.52 |
| Omicron | Dec. 11 2021 | BNT162b2  | Hospitalization     | Two-dose waned     | 0.33 | 0.08-0.53  | 0.24-0.44 |
| Omicron | Dec. 11 2021 | mRNA-1273 | Symptomatic disease | Three-dose boosted | 0.56 | 0.39-0.7   | 0.52-0.6  |
| Omicron | Dec. 11 2021 | BNT162b2  | Symptomatic disease | Three-dose boosted | 0.59 | 0.43-0.72  | 0.56-0.63 |
| Omicron | Dec. 11 2021 | mRNA-1273 | Symptomatic disease | Two-dose waned     | 0.15 | -0.11-0.36 | 0.11-0.21 |
| Omicron | Dec. 11 2021 | BNT162b2  | Symptomatic disease | Two-dose waned     | 0.11 | -0.17-0.32 | 0.07-0.16 |
| Omicron | Dec. 11 2021 | mRNA-1273 | All infections      | Three-dose boosted | 0.62 | 0.46-0.75  | 0.57-0.67 |
| Omicron | Dec. 11 2021 | BNT162b2  | All infections      | Three-dose boosted | 0.64 | 0.49-0.76  | 0.6-0.68  |
| Omicron | Dec. 11 2021 | mRNA-1273 | All infections      | Two-dose waned     | 0.36 | 0.12-0.57  | 0.24-0.51 |

|         |              |           |                     |                    |      |           |           |
|---------|--------------|-----------|---------------------|--------------------|------|-----------|-----------|
| Omicron | Dec. 11 2021 | BNT162b2  | All infections      | Two-dose waned     | 0.31 | 0.06-0.54 | 0.2-0.47  |
| Delta   | Delta        | mRNA-1273 | Hospitalization     | Three-dose boosted | 0.98 | 0.94-1    | 0.97-0.98 |
| Delta   | Delta        | BNT162b2  | Hospitalization     | Three-dose boosted | 0.98 | 0.95-1    | 0.97-0.98 |
| Delta   | Delta        | mRNA-1273 | Hospitalization     | Two-dose waned     | 0.86 | 0.77-0.93 | 0.84-0.87 |
| Delta   | Delta        | BNT162b2  | Hospitalization     | Two-dose waned     | 0.81 | 0.7-0.89  | 0.78-0.83 |
| Delta   | Delta        | mRNA-1273 | Symptomatic disease | Three-dose boosted | 0.92 | 0.86-0.97 | 0.91-0.93 |
| Delta   | Delta        | BNT162b2  | Symptomatic disease | Three-dose boosted | 0.93 | 0.87-0.97 | 0.92-0.94 |
| Delta   | Delta        | mRNA-1273 | Symptomatic disease | Two-dose waned     | 0.61 | 0.45-0.74 | 0.58-0.65 |
| Delta   | Delta        | BNT162b2  | Symptomatic disease | Two-dose waned     | 0.52 | 0.33-0.66 | 0.47-0.56 |
| Delta   | Delta        | mRNA-1273 | All infections      | Three-dose boosted | 0.84 | 0.74-0.92 | 0.8-0.88  |
| Delta   | Delta        | BNT162b2  | All infections      | Three-dose boosted | 0.85 | 0.75-0.93 | 0.81-0.89 |
| Delta   | Delta        | mRNA-1273 | All infections      | Two-dose waned     | 0.65 | 0.5-0.77  | 0.61-0.69 |
| Delta   | Delta        | BNT162b2  | All infections      | Two-dose waned     | 0.6  | 0.43-0.73 | 0.54-0.66 |

**Table S8.** VE validation data for the Omicron variant shown in Figure 3 for two vaccines, two endpoints, and two immune statuses (two-dose waned and boosted with a third dose).

| Ref. | Vaccine   | Dose               | Endpoint        | VE   | CI          | Est. cases vaccine group | Est. cases control group |
|------|-----------|--------------------|-----------------|------|-------------|--------------------------|--------------------------|
| [53] | mRNA-1273 | Three-dose boosted | Hospitalization | 97.5 | 96.3 - 98.3 | 25.9                     | 1037                     |
| [54] | BNT162b2  | Two-dose waned     | Hospitalization | 51.6 | 47.2 - 55.6 | 776.8                    | 1604.9                   |
| [54] | BNT162b2  | Three-dose boosted | Hospitalization | 88.8 | 87.3 - 90.1 | 273.1                    | 2438.4                   |
| [54] | mRNA-1273 | Three-dose boosted | Hospitalization | 90.2 | 87.3 - 92.5 | 60.7                     | 618.9                    |

|      |           |                    |                     |      |             |         |         |
|------|-----------|--------------------|---------------------|------|-------------|---------|---------|
| [55] | BNT162b2  | Two-dose waned     | Hospitalization     | 34.9 | 17.7 - 48.4 | 116.2   | 178.5   |
| [56] | BNT162b2  | Two-dose waned     | Symptomatic disease | 8.8  | 7 - 10.5    | 20033.7 | 21966.8 |
| [56] | BNT162b2  | Three-dose boosted | Symptomatic disease | 67.2 | 66.5 - 67.8 | 12151   | 37045.9 |
| [56] | mRNA-1273 | Two-dose waned     | Symptomatic disease | 14.9 | 2.9 - 24.7  | 426.3   | 500.9   |
| [56] | mRNA-1273 | Three-dose boosted | Symptomatic disease | 66.3 | 63.7 - 68.8 | 902.5   | 2678    |

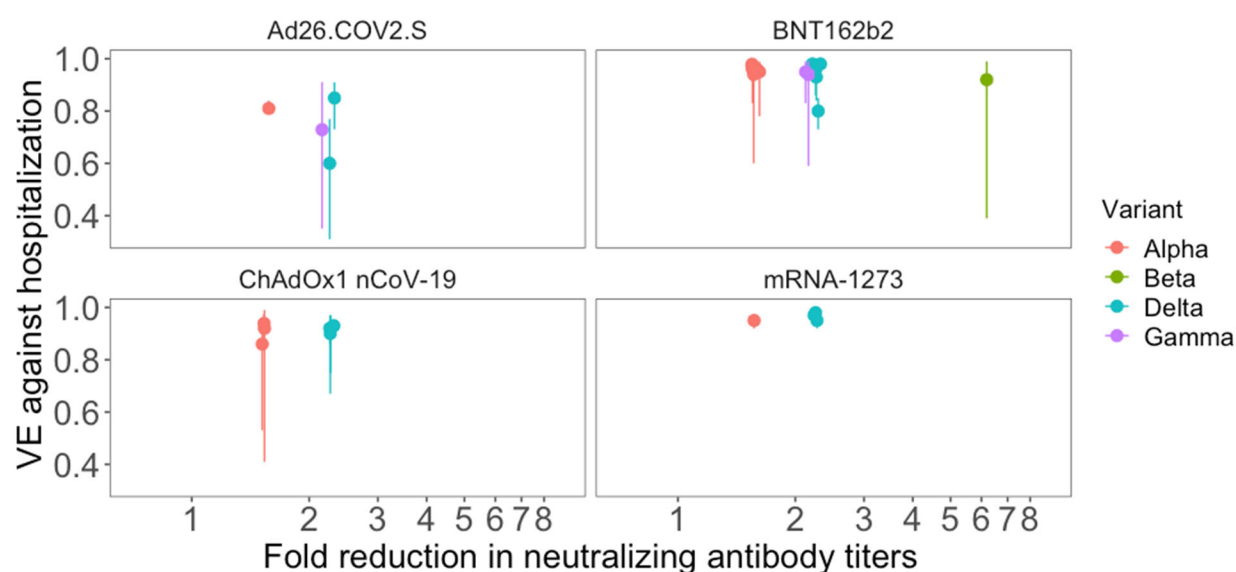

**Figure S1.** VE against hospitalization by vaccine plotted against variant-specific reductions in neutralizing antibody titers relative to WT virus. Each point (and 95% CI) represents a single estimate of VE for a single vaccine & virus variant from an observational study. Points have been slightly jittered along the x-axis to facilitate presentation.



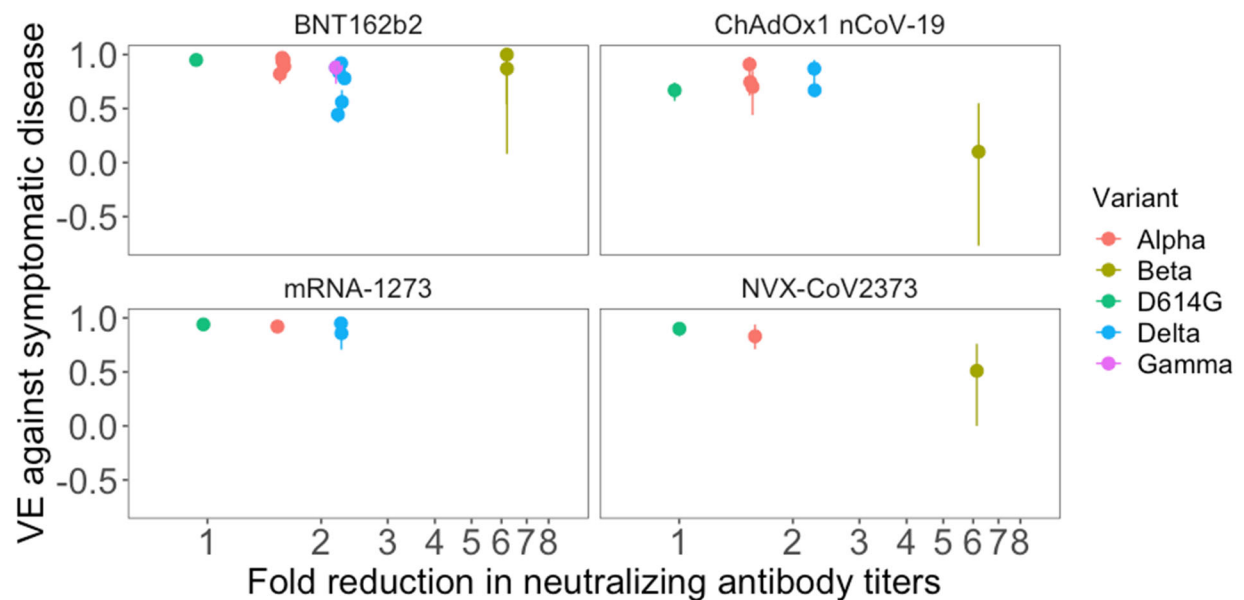

**Figure S2.** VE against symptomatic disease by vaccine plotted against variant-specific reductions in neutralizing antibody titers relative to WT virus. Each point (and 95% CI) represents a single estimate of VE for a single vaccine & virus variant from an observational study. Points have been slightly jittered along the x-axis to facilitate presentation.

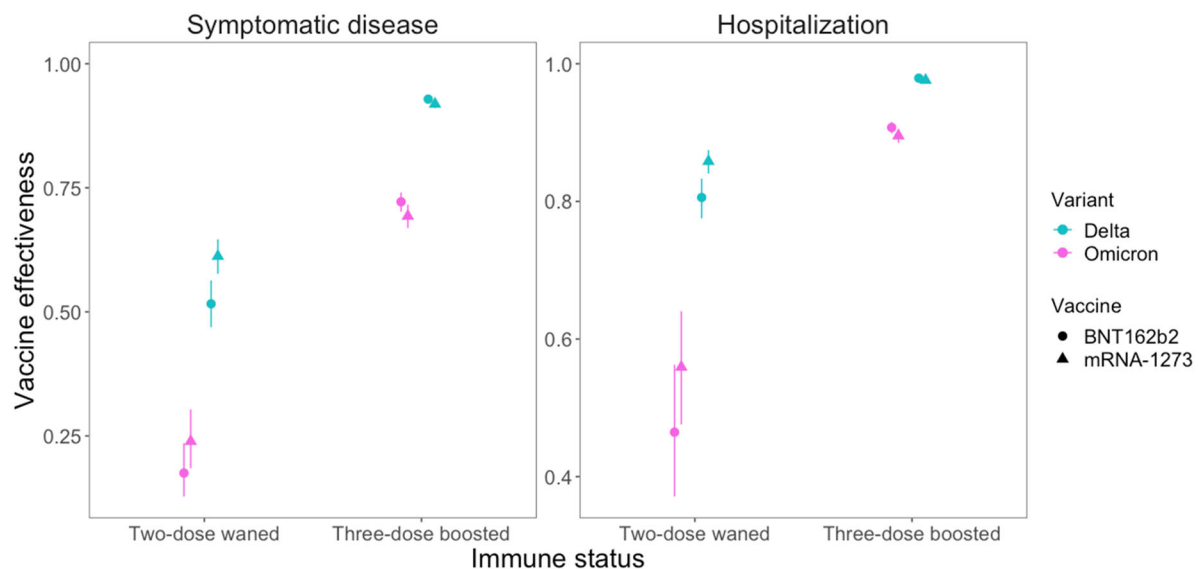

**Figure S3.** Comparison of estimated VE for the Omicron variant and Delta variants for two endpoints, two vaccines, and two immune statuses (6+ months after two doses (Waned) and shortly after a 3<sup>rd</sup> dose (Boosted)).

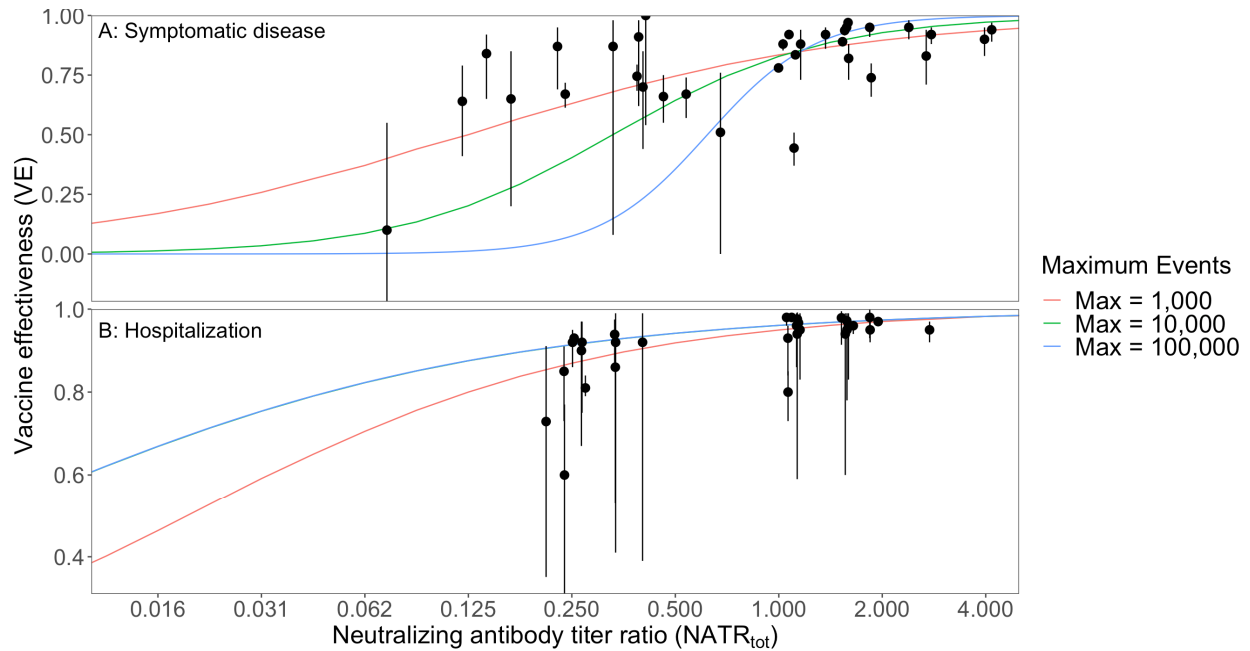

**Figure S4.** Illustration of the effect of large studies on the fitted relationship between VE and  $NATR_{tot}$ . Vaccine Effectiveness (VE) is plotted against variant- and vaccine-specific neutralizing antibody titer ratios ( $NATR_{tot}$ ) for (A) symptomatic disease and (B) hospitalization. Each point (and 95% CI) represents a single empirical estimate of VE for a single vaccine & virus variant. Points are jittered slightly along the x-axis to facilitate presentation. Each line shows the fitted model using a different maximum value for events (symptomatic cases or hospitalizations) in the control group, corresponding to a different maximum weight given to any one data point. When the maximum value is 10,000 or 100,000, a few points at high  $NATR_{tot}$  with very large sample sizes distort the relationship leading to a poor fit at low  $NATR_{tot}$ .

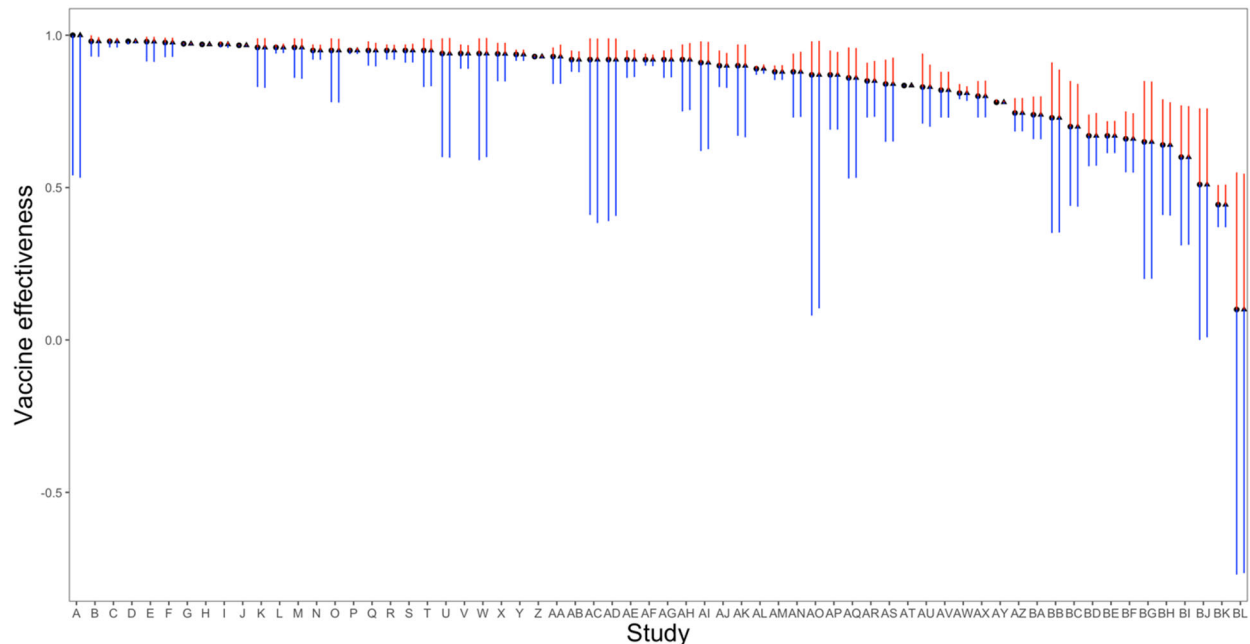

**Figure S5.** Vaccine effectiveness and 95% CIs for each study (circles) and generated using estimated infections in each arm of each study (triangles), which were not reported in most studies. Upper CIs are shown in red and lower CIs are shown in blue.

## References

1. Anichini, G.; Terrosi, C.; Gori Savellini, G.; Gandolfo, C.; Franchi, F.; Cusi, M.G. Neutralizing Antibody Response of Vaccinees to SARS-CoV-2 Variants. *Vaccines* **2021**, *9*, 517, doi:10.3390/vaccines9050517.
2. Bowen, J.E.; Addetia, A.; Dang, H.V.; Stewart, C.; Brown, J.T.; Sharkey, W.K.; Sprouse, K.R.; Walls, A.C.; Mazzitelli, I.G.; Logue, J.K.; et al. Omicron Spike Function and Neutralizing Activity Elicited by a Comprehensive Panel of Vaccines. *Science* **2022**, *377*, 890–894, doi:10.1126/science.abq0203.
3. Cameroni, E.; Bowen, J.E.; Rosen, L.E.; Saliba, C.; Zepeda, S.K.; Culap, K.; Pinto, D.; VanBlargan, L.A.; De Marco, A.; di Iulio, J.; et al. Broadly Neutralizing Antibodies Overcome SARS-CoV-2 Omicron Antigenic Shift. *Nature* **2022**, *602*, 664–670, doi:10.1038/s41586-021-04386-2.
4. Cantoni, D.; Siracusano, G.; Mayora-Neto, M.; Pastori, C.; Fantoni, T.; Lytras, S.; Di Genova, C.; Hughes, J.; on behalf of the Ambulatorio Medico San Luca Villanuova Group; Lopalco, L.; et al. Analysis of Antibody Neutralisation Activity against SARS-CoV-2 Variants and Seasonal Human Coronaviruses NL63, HKU1, and 229E Induced by Three Different COVID-19 Vaccine Platforms. *Vaccines* **2022**, *11*, 58, doi:10.3390/vaccines11010058.
5. Cele, S.; Jackson, L.; Khoury, D.S.; Khan, K.; Moyo-Gwete, T.; Tegally, H.; San, J.E.; Cromer, D.; Scheepers, C.; Amoako, D.; et al. SARS-CoV-2 Omicron Has Extensive but Incomplete Escape of Pfizer BNT162b2 Elicited Neutralization and Requires ACE2 for Infection. *medRxiv* **2021**, doi:10.1101/2021.12.08.21267417.

6. Davis, C.; Logan, N.; Tyson, G.; Orton, R.; Harvey, W.T.; Perkins, J.S.; Mollett, G.; Blacow, R.M.; The COVID-19 Genomics UK (COG-UK) Consortium; Peacock, T.P.; et al. Reduced Neutralisation of the Delta (B.1.617.2) SARS-CoV-2 Variant of Concern Following Vaccination. *PLOS Pathogens* **2021**, *17*, e1010022, doi:10.1371/journal.ppat.1010022.
7. Doria-Rose, N.A.; Shen, X.; Schmidt, S.D.; O'Dell, S.; McDanal, C.; Feng, W.; Tong, J.; Eaton, A.; Maglinao, M.; Tang, H.; et al. Booster of mRNA-1273 Strengthens SARS-CoV-2 Omicron Neutralization. *medRxiv* **2021**, doi:10.1101/2021.12.15.21267805.
8. Dupont, L.; Snell, L.B.; Graham, C.; Seow, J.; Merrick, B.; Lechmere, T.; Maguire, T.J.A.; Hallett, S.R.; Pickering, S.; Charalampous, T.; et al. Neutralizing Antibody Activity in Convalescent Sera from Infection in Humans with SARS-CoV-2 and Variants of Concern. *Nat. Microbiol.* **2021**, *6*, 1433–1442, doi:10.1038/s41564-021-00974-0.
9. Garcia-Beltran, W.F.; St. Denis, K.J.; Hoelzemer, A.; Lam, E.C.; Nitido, A.D.; Sheehan, M.L.; Berrios, C.; Ofoman, O.; Chang, C.C.; Hauser, B.M.; et al. mRNA-Based COVID-19 Vaccine Boosters Induce Neutralizing Immunity against SARS-CoV-2 Omicron Variant. *Cell* **2022**, *185*, 457–466.e4, doi:10.1016/j.cell.2021.12.033.
10. Gruell, H.; Vanshylla, K.; Tober-Lau, P.; Hillus, D.; Schommers, P.; Lehmann, C.; Kurth, F.; Sander, L.E.; Klein, F. mRNA Booster Immunization Elicits Potent Neutralizing Serum Activity against the SARS-CoV-2 Omicron Variant. *Nat. Med.* **2022**, *28*, 477–480, doi:10.1038/s41591-021-01676-0.
11. Hachmann, N.P.; Miller, J.; Collier, A.Y.; Barouch, D.H. Neutralization Escape by SARS-CoV-2 Omicron Subvariant BA.4.6. *N. Engl. J. Med.* **2022**, *387*, 1904–1906, doi:10.1056/NEJMc2212117.
12. Iketani, S.; Liu, L.; Guo, Y.; Liu, L.; Chan, J.F.-W.; Huang, Y.; Wang, M.; Luo, Y.; Yu, J.; Chu, H.; et al. Antibody Evasion Properties of SARS-CoV-2 Omicron Sublineages. *Nature* **2022**, *604*, 553–556, doi:10.1038/s41586-022-04594-4.
13. Leier, H.C.; Bates, T.A.; Lyski, Z.L.; McBride, S.K.; X. Lee, D.; Coulter, F.J.; Goodman, J.R.; Lu, Z.; Curlin, M.E.; Messer, W.B.; et al. Previously Infected Vaccinees Broadly Neutralize SARS-CoV-2 Variants. *medRxiv* **2021**, doi:10.1101/2021.04.25.21256049.
14. Liu, Y.; Liu, J.; Xia, H.; Zhang, X.; Fontes-Garfias, C.R.; Swanson, K.A.; Cai, H.; Sarkar, R.; Chen, W.; Cutler, M.; et al. Neutralizing Activity of BNT162b2-Elicited Serum. *N. Engl. J. Med.* **2021**, *384*, 1466–1468, doi:10.1056/NEJMc2102017.
15. Lu, L.; Mok, B.W.Y.; Chen, L.L.; Chan, J.M.C.; Tsang, O.T.Y.; Lam, B.H.S.; Chuang, V.W.M.; Chu, A.W.H.; Chan, W.M.; Ip, J.D.; et al. Neutralization of Severe Acute Respiratory Syndrome Coronavirus 2 Omicron Variant by Sera From BNT162b2 or CoronaVac Vaccine Recipients. *Clinical Infectious Diseases* **2022**, *75*, e822–e826, doi:10.1093/cid/ciab1041.
16. Lustig, Y.; Zuckerman, N.; Nemet, I.; Atari, N.; Kliker, L.; Regev-Yochay, G.; Sapir, E.; Mor, O.; Alroy-Preis, S.; Mendelson, E.; et al. Neutralising Capacity against Delta (B.1.617.2) and Other Variants of Concern Following Comirnaty (BNT162b2, BioNTech/Pfizer) Vaccination in Health Care Workers, Israel. *Eurosurveillance* **2021**, *26*, doi:10.2807/1560-7917.ES.2021.26.26.2100557.
17. Lyke, K.E.; Atmar, R.L.; Islas, C.D.; Posavad, C.M.; Szydlo, D.; Paul Chourdury, R.; Deming, M.E.; Eaton, A.; Jackson, L.A.; Branche, A.R.; et al. Rapid Decline in Vaccine-Boosted Neutralizing Antibodies against SARS-CoV-2 Omicron Variant. *Cell Reports Medicine* **2022**, *3*, 100679, doi:10.1016/j.xcrm.2022.100679.

18. McCallum, M.; Bassi, J.; De Marco, A.; Chen, A.; Walls, A.C.; Di Iulio, J.; Tortorici, M.A.; Navarro, M.-J.; Silacci-Fregni, C.; Saliba, C.; et al. SARS-CoV-2 Immune Evasion by the B.1.427/B.1.429 Variant of Concern. *Science* **2021**, *373*, 648–654, doi:10.1126/science.abi7994.
19. Qu, P.; Faraone, J.N.; Evans, J.P.; Zheng, Y.-M.; Yu, L.; Ma, Q.; Carlin, C.; Lozanski, G.; Saif, L.J.; Oltz, E.M.; et al. Durability of Booster mRNA Vaccine against SARS-CoV-2 BA.2.12.1, BA.4, and BA.5 Subvariants. *N. Engl. J. Med.* **2022**, *387*, 1329–1331, doi:10.1056/NEJMc2210546.
20. Su, D.; Li, X.; He, C.; Huang, X.; Chen, M.; Wang, Q.; Qin, W.; Liang, Y.; Xu, R.; Wu, J.; et al. Broad Neutralization against SARS-CoV-2 Variants Induced by a Modified B.1.351 Protein-Based COVID-19 Vaccine Candidate. *bioRxiv* **2021**, 2021.05.16.444369, doi:10.1101/2021.05.16.444369.
21. Tang, J.; Lee, Y.; Ravichandran, S.; Grubbs, G.; Huang, C.; Stauff, C.; Wang, T.; Golding, B.; Golding, H.; Khurana, S. Reduced Neutralization of SARS-CoV-2 Variants by Convalescent Plasma and Hyperimmune Intravenous Immunoglobulins for Treatment of COVID-19. *bioRxiv* **2021**, 2021.03.19.436183, doi:10.1101/2021.03.19.436183.
22. van Gils, M.J.; Lavell, A.; van der Straten, K.; Appelman, B.; Bontjer, I.; Poniman, M.; Burger, J.A.; Oomen, M.; Bouhuijs, J.H.; van Vught, L.A.; et al. Antibody Responses against SARS-CoV-2 Variants Induced by Four Different SARS-CoV-2 Vaccines in Health Care Workers in the Netherlands: A Prospective Cohort Study. *PLOS Medicine* **2022**, *19*, e1003991, doi:10.1371/journal.pmed.1003991.
23. Wilhelm, A.; Widera, M.; Grikscheit, K.; Toptan, T.; Schenk, B.; Pallas, C.; Metzler, M.; Kohmer, N.; Hoehl, S.; Helfritz, F.A.; et al. Reduced Neutralization of SARS-CoV-2 Omicron Variant by Vaccine Sera and Monoclonal Antibodies. *medRxiv* **2021**, doi:10.1101/2021.12.07.21267432.
24. Wu, K.; Werner, A.P.; Moliva, J.I.; Koch, M.; Choi, A.; Stewart-Jones, G.B.E.; Bennett, H.; Boyoglu-Barnum, S.; Shi, W.; Graham, B.S.; et al. *mRNA-1273 Vaccine Induces Neutralizing Antibodies against Spike Mutants from Global SARS-CoV-2 Variants*; Immunology, 2021;
25. Yu, J.; Collier, A.Y.; Rowe, M.; Mardas, F.; Ventura, J.D.; Wan, H.; Miller, J.; Powers, O.; Chung, B.; Siamatu, M.; et al. Neutralization of the SARS-CoV-2 Omicron BA.1 and BA.2 Variants. *N. Engl. J. Med.* **2022**, *386*, 1579–1580, doi:10.1056/NEJMc2201849.
26. Yu, X.; Wei, D.; Xu, W.; Liu, C.; Guo, W.; Li, X.; Tan, W.; Liu, L.; Zhang, X.; Qu, J.; et al. Neutralizing Activity of BBIBP-CorV Vaccine-Elicited Sera against Beta, Delta and Other SARS-CoV-2 Variants of Concern. *Nat. Comm.* **2022**, *13*, 1788, doi:10.1038/s41467-022-29477-0.
27. Polinski, J.M.; Weckstein, A.R.; Batech, M.; Kabelac, C.; Kamath, T.; Harvey, R.; Jain, S.; Rassen, J.A.; Khan, N.; Schneeweiss, S. Durability of the Single-Dose Ad26.COV2.S Vaccine in the Prevention of COVID-19 Infections and Hospitalizations in the US Before and During the Delta Variant Surge. *JAMA Network Open* **2022**, *5*, e222959–e222959, doi:10.1001/jamanetworkopen.2022.2959.
28. Skowronski, D.M.; Setayeshgar, S.; Febriani, Y.; Ouakki, M.; Zou, M.; Talbot, D.; Prystajecky, N.; Tyson, J.R.; Gilca, R.; Brousseau, N.; et al. Two-Dose SARS-CoV-2 Vaccine Effectiveness with Mixed Schedules and Extended Dosing Intervals: Test-Negative Design Studies from British Columbia and Quebec, Canada. *medRxiv* **2021**, 2021.10.26.21265397, doi:10.1101/2021.10.26.21265397.

29. Andrews, N.; Tessier, E.; Stowe, J.; Gower, C.; Kirsebom, F.; Simmons, R.; Gallagher, E.; Chand, M.; Brown, K.; Ladhani, S.N.; et al. Vaccine Effectiveness and Duration of Protection of Comirnaty, Vaxzevria and Spikevax against Mild and Severe COVID-19 in the UK. *medRxiv* **2021**, doi:10.1101/2021.09.15.21263583.
30. Stowe, J.; Andrews, N.; Kirsebom, F.; Ramsay, M.; Bernal, J.L. Effectiveness of COVID-19 Vaccines against Omicron and Delta Hospitalisation: Test Negative Case-Control Study. *medRxiv* **2022**, doi:10.1101/2022.04.01.22273281.
31. Haas, E.J.; Angulo, F.J.; McLaughlin, J.M.; Anis, E.; Singer, S.R.; Khan, F.; Brooks, N.; Smaja, M.; Mircus, G.; Pan, K.; et al. Impact and Effectiveness of mRNA BNT162b2 Vaccine against SARS-CoV-2 Infections and COVID-19 Cases, Hospitalisations, and Deaths Following a Nationwide Vaccination Campaign in Israel: An Observational Study Using National Surveillance Data. *The Lancet* **2021**, 397, 1819–1829, doi:10.1016/S0140-6736(21)00947-8.
32. Martínez-Baz, I.; Miqueleiz, A.; Casado, I.; Navascués, A.; Trobajo-Sanmartín, C.; Burgui, C.; Guevara, M.; Ezpeleta, C.; Castilla, J.; Working Group for the Study of COVID-19 in Navarra Effectiveness of COVID-19 Vaccines in Preventing SARS-CoV-2 Infection and Hospitalisation, Navarre, Spain, January to April 2021. *Eurosurveillance* **2021**, 26, doi:10.2807/1560-7917.ES.2021.26.21.2100438.
33. Nasreen, S.; Chung, H.; He, S.; Brown, K.A.; Gubbay, J.B.; Buchan, S.A.; Fell, D.B.; Austin, P.C.; Schwartz, K.L.; Sundaram, M.E.; et al. Effectiveness of COVID-19 Vaccines against Symptomatic SARS-CoV-2 Infection and Severe Outcomes with Variants of Concern in Ontario. *Nat. Microbiol.* **2022**, 7, 379–385, doi:10.1038/s41564-021-01053-0.
34. Bajema, K.L.; Dahl, R.M.; Prill, M.M.; Meites, E.; Rodriguez-Barradas, M.C.; Marconi, V.C.; Beenhouwer, D.O.; Brown, S.T.; Holodniy, M.; Lucero-Obusan, C.; et al. Effectiveness of COVID-19 mRNA Vaccines Against COVID-19–Associated Hospitalization — Five Veterans Affairs Medical Centers, United States, February 1–August 6, 2021. *MMWR Morb. Mortal. Wkly. Rep.* **2021**, 70, 1294–1299, doi:10.15585/mmwr.mm7037e3.
35. Tartof, S.Y.; Slezak, J.M.; Fischer, H.; Hong, V.; Ackerson, B.K.; Ranasinghe, O.N.; Frankland, T.B.; Ogun, O.A.; Zamparo, J.M.; Gray, S.; et al. Effectiveness of mRNA BNT162b2 COVID-19 Vaccine up to 6 Months in a Large Integrated Health System in the USA: A Retrospective Cohort Study. *The Lancet* **2021**, S0140673621021838, doi:10.1016/S0140-6736(21)02183-8.
36. Bruxvoort, K.J.; Sy, L.S.; Qian, L.; Ackerson, B.K.; Luo, Y.; Lee, G.S.; Tian, Y.; Florea, A.; Aragonés, M.; Tubert, J.E.; et al. Effectiveness of mRNA-1273 against Delta, Mu, and Other Emerging Variants. *medRxiv* **2021**, 2021.09.29.21264199, doi:10.1101/2021.09.29.21264199.
37. Ranzani, O.T.; dos Santos Leite, R.; Castilho, L.D.; Maymone Gonçalves, C.C.; Resende, G.; de Melo, R.L.; Croda, J. Vaccine Effectiveness of Ad26.COV2.S against Symptomatic COVID-19 and Clinical Outcomes in Brazil: A Test-Negative Study Design. *medRxiv* **2021**, 2021.10.15.21265006, doi:10.1101/2021.10.15.21265006.
38. Lopez Bernal, J.; Andrews, N.; Gower, C.; Gallagher, E.; Simmons, R.; Thelwall, S.; Stowe, J.; Tessier, E.; Groves, N.; Dabrera, G.; et al. Effectiveness of Covid-19 Vaccines against the B.1.617.2 (Delta) Variant. *N. Engl. J. Med.* **2021**, 385, 585–594, doi:10.1056/NEJMoa2108891.

39. Heath, P.T.; Galiza, E.P.; Baxter, D.N.; Boffito, M.; Browne, D.; Burns, F.; Chadwick, D.R.; Clark, R.; Cosgrove, C.; Galloway, J.; et al. Safety and Efficacy of NVX-CoV2373 Covid-19 Vaccine. *N. Engl. J. Med.* **2021**, *385*, 1172–1183, doi:10.1056/NEJMoa2107659.
40. Emary, K.R.W.; Golubchik, T.; Aley, P.K.; Ariani, C.V.; Angus, B.J.; Bibi, S.; Blane, B.; Bonsall, D.; Cicconi, P.; Charlton, S.; et al. Efficacy of ChAdOx1 nCoV-19 (AZD1222) Vaccine against SARS-CoV-2 VOC 202012/01 (B.1.1.7). *SSRN Journal* **2021**, doi:10.2139/ssrn.3779160.
41. Sadoff, J.; Gray, G.; Vandebosch, A.; Cárdenas, V.; Shukarev, G.; Grinsztejn, B.; Goepfert, P.A.; Truyers, C.; Fennema, H.; Spiessens, B.; et al. Safety and Efficacy of Single-Dose Ad26.COV2.S Vaccine against Covid-19. *N. Engl. J. Med.* **2021**, *384*, 2187–2201, doi:10.1056/NEJMoa2101544.
42. Shinde, V.; Bhikha, S.; Hoosain, Z.; Archary, M.; Bhorat, Q.; Fairlie, L.; Lalloo, U.; Masilela, M.S.L.; Moodley, D.; Hanley, S.; et al. Efficacy of NVX-CoV2373 Covid-19 Vaccine against the B.1.351 Variant. *N. Engl. J. Med.* **2021**, *384*, 1899–1909, doi:10.1056/NEJMoa2103055.
43. Al Kaabi, N.; Zhang, Y.; Xia, S.; Yang, Y.; Al Qahtani, M.M.; Abdulrazzaq, N.; Al Nusair, M.; Hassany, M.; Jawad, J.S.; Abdalla, J.; et al. Effect of 2 Inactivated SARS-CoV-2 Vaccines on Symptomatic COVID-19 Infection in Adults: A Randomized Clinical Trial. *JAMA* **2021**, *326*, 35, doi:10.1001/jama.2021.8565.
44. Voysey, M.; Clemens, S.A.C.; Madhi, S.A.; Weckx, L.Y.; Folegatti, P.M.; Aley, P.K.; Angus, B.; Baillie, V.L.; Barnabas, S.L.; Bhorat, Q.E.; et al. Safety and Efficacy of the ChAdOx1 nCoV-19 Vaccine (AZD1222) against SARS-CoV-2: An Interim Analysis of Four Randomised Controlled Trials in Brazil, South Africa, and the UK. *The Lancet* **2021**, *397*, 99–111, doi:10.1016/S0140-6736(20)32661-1.
45. Tanriover, M.D.; Doğanay, H.L.; Akova, M.; Güner, H.R.; Azap, A.; Akhan, S.; Köse, Ş.; Erdiñç, F.Ş.; Akalın, E.H.; Tabak, Ö.F.; et al. Efficacy and Safety of an Inactivated Whole-Virion SARS-CoV-2 Vaccine (CoronaVac): Interim Results of a Double-Blind, Randomised, Placebo-Controlled, Phase 3 Trial in Turkey. *The Lancet* **2021**, *398*, 213–222, doi:10.1016/S0140-6736(21)01429-X.
46. Jakarta, W.S.I.C.I. Indonesia Grants Emergency Approval for Sinovac Vaccine. *The Straits Times* 2021.
47. Baden, L.R.; El Sahly, H.M.; Essink, B.; Kotloff, K.; Frey, S.; Novak, R.; Diemert, D.; Spector, S.A.; Rouphael, N.; Creech, C.B.; et al. Efficacy and Safety of the mRNA-1273 SARS-CoV-2 Vaccine. *N. Engl. J. Med.* **2021**, *384*, 403–416, doi:10.1056/NEJMoa2035389.
48. Novavax COVID-19 Vaccine Demonstrates 90% Overall Efficacy and 100% Protection Against Moderate and Severe Disease in PREVENT-19 Phase 3 Trial Available online: <https://ir.novavax.com/2021-06-14-Novavax-COVID-19-Vaccine-Demonstrates-90-Overall-Efficacy-and-100-Protection-Against-Moderate-and-Severe-Disease-in-PREVENT-19-Phase-3-Trial> (accessed on 30 March 2023).
49. Polack, F.P.; Thomas, S.J.; Kitchin, N.; Absalon, J.; Gurtman, A.; Lockhart, S.; Perez, J.L.; Pérez Marc, G.; Moreira, E.D.; Zerbini, C.; et al. Safety and Efficacy of the BNT162b2 mRNA Covid-19 Vaccine. *N. Engl. J. Med.* **2020**, *383*, 2603–2615, doi:10.1056/NEJMoa2034577.

50. Logunov, D.Y.; Dolzhikova, I.V.; Shcheblyakov, D.V.; Tukhvatulin, A.I.; Zubkova, O.V.; Dzharullaeva, A.S.; Kovyrshina, A.V.; Lubenets, N.L.; Grousova, D.M.; Erokhova, A.S.; et al. Safety and Efficacy of an rAd26 and rAd5 Vector-Based Heterologous Prime-Boost COVID-19 Vaccine: An Interim Analysis of a Randomised Controlled Phase 3 Trial in Russia. *The Lancet* **2021**, *397*, 671–681, doi:10.1016/S0140-6736(21)00234-8.
51. Tang, P.; Hasan, M.R.; Chemaitelly, H.; Yassine, H.M.; Benslimane, F.M.; Al Khatib, H.A.; AlMukdad, S.; Coyle, P.; Ayoub, H.H.; Al Kanaani, Z.; et al. BNT162b2 and mRNA-1273 COVID-19 Vaccine Effectiveness against the SARS-CoV-2 Delta Variant in Qatar. *Nat. Med.* **2021**, *27*, 2136–2143, doi:10.1038/s41591-021-01583-4.
52. Nordström, P.; Ballin, M.; Nordström, A. Effectiveness of Heterologous ChAdOx1 nCoV-19 and mRNA Prime-Boost Vaccination against Symptomatic Covid-19 Infection in Sweden: A Nationwide Cohort Study. *The Lancet Regional Health - Europe* **2021**, *11*, 100249, doi:10.1016/j.lanepe.2021.100249.
53. Tseng, H.F.; Ackerson, B.K.; Luo, Y.; Sy, L.S.; Talarico, C.A.; Tian, Y.; Bruxvoort, K.J.; Tubert, J.E.; Florea, A.; Ku, J.H.; et al. Effectiveness of mRNA-1273 against SARS-CoV-2 Omicron and Delta Variants. *Nat. Med.* **2022**, *28*, 1063–1071, doi:10.1038/s41591-022-01753-y.
54. Hansen, C.; Schelde, A.; Moustsen-Helm, I.; Embor, H.-D.; Eriksen, R.; Stegger, M.; Krause, T.; Mølbak, K.; Valentiner-Branth, P. Vaccine Effectiveness against Infection and COVID-19-Associated Hospitalisation with the Omicron (B.1.1.529) Variant after Vaccination with the BNT162b2 or mRNA-1273 Vaccine: A Nationwide Danish Cohort Study. *Research Square* **2022**, doi:10.21203/rs.3.rs-1486018/v1.
55. *SARS-CoV-2 Variants of Concern and Variants under Investigation*; UK Health Security Agency, 2021;
56. Andrews, N.; Stowe, J.; Kirsebom, F.; Toffa, S.; Rickeard, T.; Gallagher, E.; Gower, C.; Kall, M.; Groves, N.; O’Connell, A.-M.; et al. Covid-19 Vaccine Effectiveness against the Omicron (B.1.1.529) Variant. *N. Engl. J. Med.* **2022**, *386*, 1532–1546, doi:10.1056/NEJMoa2119451.
